# Supplementary material for: How Physicians Discuss Uncertainty With Parents in Intensive Care Units
Source: Oxford University Press journal article supplement (doi:10.1542/peds.2021-055980), 2022-05-23
Supplement: peds_2021055980supplementarydata.pdf [file peds_2021055980supplementarydata.pdf]

## Supplemental Information

**SUPPLEMENTAL TABLE 1** Case Characteristics

| # Case    | Description                                                                                                                                                                                                                                                                                                                                                                                                                                            |
|-----------|--------------------------------------------------------------------------------------------------------------------------------------------------------------------------------------------------------------------------------------------------------------------------------------------------------------------------------------------------------------------------------------------------------------------------------------------------------|
| #N1 data: | A prematurely born boy admitted to the NICU, who seemed stable, but suddenly deteriorated because of unexplainable kidney failure and would die soon. Three conversations between both parents with a migration background, 2 neonatologists, and 2 nurses.                                                                                                                                                                                            |
| #N2 data: | A prematurely born girl admitted to the NICU, who was transferred to medium care at another hospital because of sudden improvement. Three conversations between a Dutch father and immigrant mother and 2 neonatologists.                                                                                                                                                                                                                              |
| #N3 data: | A prematurely born boy admitted to the NICU. The child's twin brother was also admitted to the NICU. Whereas the brother was doing well, this child's situation remained unstable and deteriorated. Three conversations between Dutch parents and 3 neonatologists.                                                                                                                                                                                    |
| #N4 data: | A prematurely born girl admitted to the NICU. The child's situation remained unchanged (ie, did not improve but also did not get worse) while receiving life-sustaining treatment. Four conversations between Dutch parents and 2 neonatologists.                                                                                                                                                                                                      |
| #P1 data: | A male toddler (age range 1–4 y) with a congenital disorder, admitted to the PICU, who deteriorated and died. Six conversations between immigrant parents and 3 pediatric intensivists, 2 pediatricians, 2 pediatric neurologists, a metabolic pediatrician, 7 nurses, and a social worker.                                                                                                                                                            |
| #P2 data: | A teenage boy (age range 12–16 y) with a congenital disorder, admitted to the PICU. During earlier hospital admissions, the boy had a good quality of life, but now deteriorated and died. Three conversations between Dutch parents and the patient's brother, and a pediatrician, 2 pediatric intensivists, an anesthesiologist, a nurse, a medical educationalist, and a social worker.                                                             |
| #P3 data: | A girl (age range 16–21 y) with a congenital disorder, admitted to the PICU. Parents quickly decided that the child suffered too much, and they requested palliative care, to which physicians eventually agreed. Parents took their child home for the final phase of life. Four conversations between Dutch parents and an anesthesiologist–pediatric intensivist, 2 pediatric intensivists, a pediatric neurologist, 2 pediatricians, and 2 nurses. |
| #P4 data: | A girl (age range 4–12 y) with a congenital disorder, admitted to the PICU. Physicians were committed to do everything possible, although the child's situation seemed unexplainable. Child had been admitted to the ICU for already 5 mo. Situation slightly improved and the plan was to transfer the child to a special care unit, but this seemed too risky. Four conversations between Dutch parents and 2 pediatricians.                         |

Because of privacy regulations, we report age ranges instead of exact ages.
